# Supplementary material for: Exclusive dependence of IL-10Rα signalling on intestinal microbiota homeostasis and control of whipworm infection
Source: PLoS Pathog. 2019 Jan 14;15(1):e1007265. doi: 10.1371/journal.ppat.1007265 (PMC6347331; doi:10.1371/journal.ppat.1007265)
Supplement: S2 File — List of The 3i consortium authors and their affiliations. (XLSX) [file ppat.1007265.s016.xlsx]

## Sheet: Group authors
Alphabetically
Lucie Abeler-Dörner	Department of Immunobiology, King's College London, UK
David J. Adams	Wellcome Sanger Institute, Hinxton, UK
Kolawole Babalola	Department of Immunobiology, King's College London, UK
Carmen Ballesteros Reviriego	Wellcome Sanger Institute, Hinxton, UK
Philippa R. Barton	University of Cambridge, UK
Cordelia Brandt	Wellcome Sanger Institute, Hinxton, UK
Ryan Brinkman	University of British Columbia, Vancouver, Canada
Katherine R. Bull	MRC Human Immunology Unit, University of Oxford, UK
Susana Caetano	Department of Immunobiology, King's College London, UK
Emma Cambridge	Wellcome Sanger Institute, Hinxton, UK
Eleanor Cawthorne	MRC Human Immunology Unit, University of Oxford, UK
Anna Chan	Department of Immunobiology, King's College London, UK
Simon Clare	Wellcome Sanger Institute, Hinxton, UK
Richard Cornall	MRC Human Immunology Unit, University of Oxford, UK
Tanya L. Crockford	MRC Human Immunology Unit, University of Oxford, UK
Gordon Dougan	Wellcome Sanger Institute, Hinxton, UK
Maria A. Duque-Correa	Wellcome Sanger Institute, Hinxton, UK
Matthew Edmans	MRC Human Immunology Unit, University of Oxford, UK
Simon Foreman	University of Manchester, UK
Richard K. Grencis	University of Manchester, UK
Gillian Griffiths	University of Cambridge, UK
Mark Griffiths	Wellcome Sanger Institute, Hinxton, UK
Adrian Hayday	Department of Immunobiology, King's College London, UK
Keng Imm Hng	Department of Immunobiology, King's College London, UK
Jua Iwasaki	Imperial College London, UK
William Jacobs Jr.	Albert Einstein College of Medicine, New York, US
Leanne Kane	Wellcome Sanger Institute, Hinxton, UK
Adam Laing	Department of Immunobiology, King's College London, UK
Christopher J. Lelliott	Wellcome Sanger Institute, Hinxton, UK
Clare Lloyd	Imperial College London, UK
Anna Lorenc	Department of Immunobiology, King's College London, UK
Kevin Maloy	Dunn School of Pathology, University of Oxford, UK
Jeremy Mason	European Biinformatics Institute, Hinxton, UK
Terry Meehan	European Biinformatics Institute, Hinxton, UK
Amrutha Meeniga	Department of Immunobiology, King's College London, UK
David Melvin	Wellcome Sanger Institute, Hinxton, UK
Belén Morón-Flores	Dunn School of Pathology, University of Oxford, UK
George Notley	Wellcome Sanger Institute, Hinxton, UK
Sean O'Farrell	Department of Immunobiology, King's College London, UK
Agnieszka Przemska-Kosicka	Department of Immunobiology, King's College London, UK
Fiona Powrie	The Kennedy Institute of Rheumatology, University of Oxford, UK
Ramiro Ramirez-Solis	Wellcome Sanger Institute, Hinxton, UK
Edward Ryder	Wellcome Sanger Institute, Hinxton, UK
Namita Saran	Department of Immunobiology, King's College London, UK
George Song-Zhao	Dunn School of Pathology, University of Oxford, UK
Anneliese Speak	Wellcome Sanger Institute, Hinxton, UK
Dmitry Ushakov	Department of Immunobiology, King's College London, UK
Faith Uwadiae	Imperial College London, UK
Jonathan Warren	European Bioinformatics Institute, Hinxton, UK
Brian Weinrick	Albert Einstein College of Medicine, New York, US
Hannah Wardle-Jones	Wellcome Sanger Institute, Hinxton, UK
Jacqui K. White	Wellcome Sanger Institute, Hinxton, UK
Heather Wilson	Wellcome Sanger Institute, Hinxton, UK
